# Supplementary material for: Evolution of haploid and diploid populations reveals common, strong, and variable pleiotropic effects in non-home environments
Source: eLife. 2023 Oct 20;12:e92899. doi: 10.7554/eLife.92899 (PMC10629826; doi:10.7554/eLife.92899)
Supplement: Supplementary file 1. [file elife-92899-supp1.xlsx]

## Sheet: Sheet1
Bulk Fitness Assay	Evolution Environment	Ploidy of Evolution	Generation of Lineage Isolation for Sequencing				Total Number in BFA	Shared with other BFAs
			Evolution Replicate 1	Number of Clones	Evolution Replicate 2	Number of clones
hBFA	SC	1N	104	192	104	192	329	0
	CLM	1N	104	192	104	192	80	47
	FLC	1N	104	192	104	192	125	13
	GlyEtOH	1N	104	384	104	384	466	35
	0.2M NaCl	1N	N/A	0	N/A	0	0	0
	0.8M NaCl	1N	N/A	0	N/A	0	0	0
	21°C	1N	104	384	104	384	455	4
	37°C	1N	104	192	104	192	184	0
	pH 3.8	1N	104	192	104	192	284	0
	pH 7.3	1N	104	192	104	192	342	3
	48 Hr	1N	N/A	0	N/A	0	0	0
	YPD	1N	104	192	104	192	304	2
	not read						17	0
						Total	2586	104
dBFA	SC	2N	320	384	320	384	673	0
	CLM	2N	48	384	48	384	114	0
	FLC	2N	48	384	48	384	684	358
	GlyEtOH	2N	240	384	240	384	236	28
	0.2M NaCl	2N	400	0	400	384	605	0
	0.8M NaCl	2N	N/A	0	N/A	0	0	0
	21°C	2N	440	0	440	384	529	0
	37°C	2N	280	384	200	384	470	0
	pH 3.8	2N	320	384	320	384	717	0
	pH 7.3	2N	160	384	120	384	546	0
	48 Hr	2N	320	384	320	384	234	0
	YPD	2N	320	384	320	384	692	0
	2N Ancestor YPD	2N					355	0
						Total	5855	386
cBFA	SC	1N	136	171	N/A	0	0	0
	CLM	1N	32	547	N/A	0	82	47
	FLC	1N	48	542	N/A	0	482	13
	GlyEtOH	1N	80	376	N/A	0	323	35
	0.2M NaCl	1N	40	203	N/A	0	184	0
	0.8M NaCl	1N	N/A	0	8	535	517	0
	21°C	1N	160	346	N/A	0	284	4
	37°C	1N	136	253	N/A	0	182	0
	pH 3.8	1N	136	137	N/A	0	120	0
	pH 7.3	1N	136	173	N/A	0	244	3
	48 Hr	1N	N/A	0	N/A	0	0	0
	YPD	1N	136	166	N/A	0	85	2
	CLM	2N	8	384	0	0	367	0
	FLC	2N	48	384	0	0	358	358
	GlyEtOH	2N	168	384	0	0	341	28
	not read	N/A	N/A	0	N/A	0	67	2
						Total	3636	492
