# Supplementary material for: Evolution of haploid and diploid populations reveals common, strong, and variable pleiotropic effects in non-home environments
Source: eLife. 2023 Oct 20;12:e92899. doi: 10.7554/eLife.92899 (PMC10629826; doi:10.7554/eLife.92899)
Supplement: Supplementary file 2. [file elife-92899-supp2.xlsx]

## Sheet: Sheet1
Home_Environment	Number of Unique Lineages Isolated	Number of Lineages Whole Genome Sequenced	Number of Lineages with Identifiable Mutations
02M_NaCl_2N	573	16	16
02M_NaCl_alpha	149	0	0
21C_2N	511	19	18
21C_alpha	750	0	0
37C_2N	452	16	16
37C_alpha	356	0	0
CLM_2N	452	44	37
CLM_alpha	106	58	41
FLC4_2N	657	194	142
FLC4_alpha	523	60	45
GlyEtOH_2N	506	69	67
GlyEtOH_alpha	724	100	87
pH3_8_2N	687	0	0
pH3_8_alpha	211	0	0
pH7_3_2N	534	15	10
pH7_3_alpha	550	0	0
SC_2N	627	0	0
SC_alpha	473	0	0
YPD_2N	643	0	0
YPD_alpha	369	0	0
YPDAnc_2N	341	0	0
	10194		479
