# Supplementary material for: Evolution of haploid and diploid populations reveals common, strong, and variable pleiotropic effects in non-home environments
Source: eLife. 2023 Oct 20;12:e92899. doi: 10.7554/eLife.92899 (PMC10629826; doi:10.7554/eLife.92899)
Supplement: Supplementary file 3. [file elife-92899-supp3.xlsx]

## Sheet: 20230627_TableofMutationsInclud
id	Home_Environment	Barcode	mutations
2293	CLM_2N	ATACTAAAAACCAAGGTAATTTTTTC_TTATTAACTTCATTAGTAATTTGTTG	PDR1-A826E	UTP11-255689C>T	CRH1-878921T>TGAGATATATGTGGGTAATTAGATAATTGTTGGGATTCCATTGTTGATAAAGGCTATAATATT.	CRH1-878916C>.GTATATGATAATATATTGATAATATAACTATTAGTTGATAGACGATAGTGGATTTTTATTCCAACAC
2946	CLM_2N	ATTGCAAGATTGAAGTAAATTTCCCG_ATTTCAAGATTCTTTACGGTTGGGGG	PDR1-C862Y	BPT1-D1369E	RPN1-K366N
1376	CLM_2N	ACGTAAACCAAGAATTTATTTCCGAT_TTATTAACTTCATTAGTAATTTGTTG	PDR1-E768G	HMRA1-294356T>G	SDL1-30324G>C	YHR130C-364600C>G	RPL8A-E107Q	PEP5-E961K	RTC4-Y338D	ECO1-Y117F	GUF1-D232H	VAB2-F18L	YKR078W-T288K	ECO1-Y117*	ATM1-F562	MDN1-363787G>C
4647	CLM_2N	CGTGCAATCGTCAAGTTTGTTTGGAC_TTTTGAACCTTATTTGGCCTTGGGAG	PDR1-E829K	ILV5-G47	YFL063W-P100	YBR284W-771105G>A	YEL010W-135963A>.AATATTATAGCCTTTATCAACAATGGAATCCCAACAATTATCTCAACATTCACCCATTTCTCAA	YEL010W-135967C>CTGTTGGAATAGAAATCAACTATCATCTACTAACTAGTATTTACATTACTAGTATATTATCATATACG.	YEL010W-135967C>CTGTTGGAATAGAAATCAACTATCATCTACTAACTAGTATTTACATTACTAGTATATTATCATATA.	YEL010W-135963A>.ACCTAATATTATAGCCTTTATCAACAATGGAATCCCAACAATTATCTCAACATTCACCCATTTCTCAA
676	CLM_2N	AATACAAACATTAAAGGACTTTTATA_ATTTCAAGATTCTTTACGGTTGGGGG	PDR1-F1047V	PEX10-999910G>T	SAP185-N621K_fs	YKL063C-A77S	NFI1-S341F	OCT1-T84I	YGR066C-S32F	RRG8-758616T>A	YGR121W-A-733294A>G
5373	CLM_2N	GAAAAAAGATCGAAATACATTCACAT_GTTTAAAACGGTTTTCTTTTTAGTTG	PDR1-F769L	HFA1-I1013K	SLA2-V642	MRPL35-1110416C>CT
4046	CLM_2N	CCGGCAACCGTGAAATGACTTATAGC_TTATTAACTTCATTAGTAATTTGTTG	PDR1-G282V	RIM8-413489G>T	UBC4-407716A>G
5165	CLM_2N	CTTAAAAATCGTAAGAATGTTACAAT_TTTTGAACCTTATTTGGCCTTGGGAG	PDR1-K540E
7360	CLM_2N	TAAGGAAGTACAAATTAACTTGATTG_TTATTAACTTCATTAGTAATTTGTTG	PDR1-L278V
4015	CLM_2N	CCGAGAACACCGAAGAAAGTTGCACA_TTATTAACTTCATTAGTAATTTGTTG	PDR1-N733Y	EXO1-L694I	FAB1-T1986A
1926	CLM_2N	AGGCAAACAGATAATAGTCTTCGCAA_ATTTCAAGATTCTTTACGGTTGGGGG	PDR1-Q762K	MAK11-L14F_fs	RAD54-D264Y	TEM1-146100C>A
3597	CLM_2N	CATAGAAGATTTAAGTTTTTTGTCAA_TTTTGAACCTTATTTGGCCTTGGGAG	PDR1-R821G	PTP3-I98
7885	CLM_2N	TATCGAAGCACCAAACAACTTCCGGT_TTATTAACTTCATTAGTAATTTGTTG	PDR1-T1043K	IRC24-A232E	YMR1-D174
3342	CLM_2N	CACCGAAGTCTGAAGGTTATTGTTTT_TTTTGAACCTTATTTGGCCTTGGGAG	PDR1-T817K	BUD7-K165*
6353	CLM_2N	GGAGAAACAGAAAACAGTTTTCTCGA_TTTTGAACCTTATTTGGCCTTGGGAG	PDR1-T817K	NUP133-E412D	RPO21-P1684Q
8951	CLM_2N	TGCGGAACGGCAAAAAAATTTGGTGT_ATTTCAAGATTCTTTACGGTTGGGGG	PDR1-T817K	RAV1-I489N_fs	NFI1-S341F	POB3-Y64*	RRG8-758616T>A
1379	CLM_2N	ACGTAAATATTAAATCTGGTTGTGAG_GTTTAAAACGGTTTTCTTTTTAGTTG	PDR1-T817K
3466	CLM_2N	CAGCCAACGGGCAAGAGTTTTAGTCG_TTATTAACTTCATTAGTAATTTGTTG	PDR1-T817K
4531	CLM_2N	CGGGGAAATCTGAACCCATTTCATTA_TTATTAACTTCATTAGTAATTTGTTG	PDR1-T817K
5124	CLM_2N	CTGTAAACACATAAATTGCTTTCGAC_TTATTAACTTCATTAGTAATTTGTTG	PDR1-T817K
7251	CLM_2N	TAAAGAATCGTTAAGCATATTTTAAA_TTATTAACTTCATTAGTAATTTGTTG	PDR1-T817K
7549	CLM_2N	TACCTAATAAGAAAAGTCGTTCTTGT_ATTTCAAGATTCTTTACGGTTGGGGG	PDR1-T817K
6259	CLM_2N	GCTTAAATGGGTAACCGTATTCTAGT_ATTTCAAGATTCTTTACGGTTGGGGG	PDR1-Y864H	REV3-L163F_fs	PRP16-A418T	POB3-Y64*
6580	CLM_2N	GGGTAAAGGGTTAAGCGATTTGCGAG_TTTTGAACCTTATTTGGCCTTGGGAG	PDR3-G957D	YNR063W-746829G>T
5460	CLM_2N	GAAGTAAAGATAAATGTCCTTTGTAT_GTTTAAAACGGTTTTCTTTTTAGTTG	PDR3-K272N	PIP2-S983
4906	CLM_2N	CTCAAAATTGAGAATACCGTTAAGCT_ATTTCAAGATTCTTTACGGTTGGGGG	PDR3-L279S	FDH1-G32D	YER133W-A-436269A>.TACCTAATATTATAGCCTTTATCAACAATGGAATCCCAACAATTATCTCAACATTCCCCCATTTCTCAA
5004	CLM_2N	CTCTAAAAGGACAAGTTCTTTTGTGG_TTATTAACTTCATTAGTAATTTGTTG	PDR3-L281F	RTS2-S53I	STB5-458934C>CA
5144	CLM_2N	CTGTCAATTGTTAACCTGTTTTATGG_ATTTCAAGATTCTTTACGGTTGGGGG	PDR3-L281F
1973	CLM_2N	AGGGGAACGGGAAAGGGAGTTGAGAC_TTATTAACTTCATTAGTAATTTGTTG	PDR3-S773I	REX3-365562G>T	ADE13-845740C>T	TDH3-882719G>T
3924	CLM_alpha	CCCCCAACATCGAAAGGGATTAAGCG_TTCCCAAGCGAATTATATTTTTGAGA	PDR1-A301S	IRC22-150294G>T	LEU1-A54T	SEC16-A1152G
9502	CLM_alpha	TTATGAAATGTGAAGAAGTTTGAAAA_TACAAAACACGTTTTCGGCTTAGCAA	PDR1-A301S	YLR171W-501185A>C	MSC2-R60T	THO2-V106G	PLB3-N316K	DOP1-S84	RRP14-282598G>C	ILV5-839353C>T
8567	CLM_alpha	TCTAGAATCGGCAAGACCGTTAATTG_TTCCCAAGCGAATTATATTTTTGAGA	PDR1-A863G	PHO81-Y598_fs	RPO21-T1509K	CDC55-T470K	SEC8-Q599H	SDS24-651330C>A
1857	CLM_alpha	AGCTGAAATAGTAACTCGTTTATGTA_TACAAAACACGTTTTCGGCTTAGCAA	PDR1-C862W	DNF1-517533TAAGCCTTAGAAGCCTTAG>T
7600	CLM_alpha	TACGTAATCTTAAAATGCATTCACAA_TTCCCAAGCGAATTATATTTTTGAGA	PDR1-E491D	YNL140C-S27R
2841	CLM_alpha	ATTACAAGTAGCAAGGACATTAGATT_TACAAAACACGTTTTCGGCTTAGCAA	PDR1-E688D	GIM3-345597T>C
8325	CLM_alpha	TCCCCAAGTAGGAAGGTAATTCGGAT_AGCTTAAGCGATTTATCGTTTCATCC	PDR1-F511V	YLR302C-731985G>.ACAATGGAATCCCAACAATTATCTCAACATTCACCCATTTCTCAG	YLR302C-731985G>.ATAGCCTTTATCAACAATGGAATCCCAACAATTATCTCAACATTCACCCATTTCTCAG	YLR302C-731985G>.CCTAATATTATAGCCTTTATCAACAATGGAATCCCAACAATTATCTCAACATTCACCCATTTCTCAG	YLR302C-731985G>.TACCTAATATTATAGCCTTTATCAACAATGGAATCCCAACAATTATCTCAACATTCACCCATTTCTCAG	YLR302C-731985G>.TATTATAGCCTTTATCAACAATGGAATCCCAACAATTATCTCAACATTCACCCATTTCTCAG	CWC22-L262V	NCA2-K544N	SES1-489204A>.CCGTATATGATAATATATTGATAATATAACTATTAGTTGATAGACGATAGTGGATTTTTATTCCAACAA
5492	CLM_alpha	GAATTAACCAGGAAATCGCTTGACAC_TTCCCAAGCGAATTATATTTTTGAGA	PDR1-F607L	CDC13-R15L	HSP82-S39L	ARP10-G279
7112	CLM_alpha	GTTCTAACTACTAACCTGATTAATAT_CTAGCAATGGTATTGGAGTTTCCTCT	PDR1-G875A	RVS167-Y141H	SFK1-D99N	SWI5-750987T>C	RPS22B-856387A>T
1892	CLM_alpha	AGGAAAATGGCTAATTGTCTTAATGG_TTCCCAAGCGAATTATATTTTTGAGA	PDR1-H723N	YBR144C-533108G>C	YCF1-722408T>G	SAM4-26241A>C	MPS2-K63Q	TAM41-G154A
1287	CLM_alpha	ACGAAAACCTTAAATTCGTTTGTTTT_TTCCCAAGCGAATTATATTTTTGAGA	PDR1-H751N	YOR022C-D553N	RPS24A-L17
1499	CLM_alpha	ACTCTAACGTAAAACCGGTTTCCGGA_CAACAAAAGCGTTTTTTACTTGTAAT	PDR1-H751Q	IRA1-K2692	YHR131C-D841DD	COS12-E117A	SRL2-L92	YMR326C-924072A>G	YMR326C-924074G>T	YMR326C-924087AG>A	YMR326C-924224C>G	YMR326C-924132G>GATGGGCGGTGGATGGTAGTAGCT.
2691	CLM_alpha	ATGCAAAATCACAAAACGCTTAAATG_TTACTAAAAGTCTTCTATGTTTTCAT	PDR1-K540Q	ADH4-17430C>A	SLD2-E414D	DSE2-A321T	YNL320W-L82S	YER064C-K288*	COS8-D211
6764	CLM_alpha	GTAGGAAACGTCAAACAAGTTATCTC_TTCCCAAGCGAATTATATTTTTGAGA	PDR1-L714R	HAP3-181518C>G	EXO70-T101I	MMT1-T33I	HRD3-I434	YOR192C-B-709743G>A
6184	CLM_alpha	GCTACAATTCAGAAGGAAGTTCGATA_TTGAGAATTTCATTATGGCTTTTCTG	PDR1-L867F	ABF1-D214E	SAS3-V350
1162	CLM_alpha	ACCATAACCATTAATAATTTTTGCGC_AGCTTAAGCGATTTATCGTTTCATCC	PDR1-L868F
3465	CLM_alpha	CAGCCAACCGCTAATAACCTTAGACT_TTCCCAAGCGAATTATATTTTTGAGA	PDR1-N1049H	SPO21-L293R
112	CLM_alpha	AAACGAACGGTGAACTCTATTTATCG_TTCCCAAGCGAATTATATTTTTGAGA	PDR1-N1050D	HLR1-D111E	YSC84-G449R	MRPS28-T77
548	CLM_alpha	AAGCTAATTAGAAATCGGTTTCGGAC_TTCCCAAGCGAATTATATTTTTGAGA	PDR1-P261L	PDR1-P261S	YHL041W-17928G>C	COX6-V82G	RPC17-416044G>C
6089	CLM_alpha	GCGACAACGGGGAAGCCGGTTGGGGG_CAACAAAAGCGTTTTTTACTTGTAAT	PDR1-R747P	PLM2-1452996G>T	HIS5-E36K
2733	CLM_alpha	ATGGCAAATCCTAAGTACTTTAGGGA_TAATTAACATCATTTAGTGTTACTGA	PDR1-R959M	URA3-A82S
9040	CLM_alpha	TGGCGAAATCTCAAGTAGCTTGTAGG_CAACAAAAGCGTTTTTTACTTGTAAT	PDR1-S259G	YCR097W-A-294990GT>G	HPT1-E142G	KKQ8-I254V	PRY2-A164V	AZF1-G96R	HIS7-C470*	YHR033W-S15*
1836	CLM_alpha	AGCTAAAAGTGTAAGCGTGTTAGAAC_TACAAAACACGTTTTCGGCTTAGCAA	PDR1-S753SVYRSFAHYS	ARP5-V186
6227	CLM_alpha	GCTCTAAGAAAGAAATGCGTTGCTAG_TACAAAACACGTTTTCGGCTTAGCAA	PDR1-S814Y	DNF1-517533TAAGCCTTAGAAGCCTTAG>T	SNF6-A175
4999	CLM_alpha	CTCGTAATGTGTAAAATTCTTTGGGA_CAACAAAAGCGTTTTTTACTTGTAAT	PDR1-S814Y	RPL25-Q32*
8518	CLM_alpha	TCGTCAAGTGGGAAGGATATTCCTCG_TAATTAACATCATTTAGTGTTACTGA	PDR1-S814Y	URA3-A82S	PRY3-L80P
4688	CLM_alpha	CGTTCAATACAGAAGATGTTTGTGAC_TTCCCAAGCGAATTATATTTTTGAGA	PDR1-T358R	UTP9-G498S
9452	CLM_alpha	TTAGGAATAAGGAAGGGTCTTGTTTT_TACAAAACACGTTTTCGGCTTAGCAA	PDR1-V819I	DNF1-517533TAAGCCTTAGAAGCCTTAG>T	UTP20-K1049R
4838	CLM_alpha	CTAGGAAGTAGCAAAAGGCTTTCTAT_TACAAAACACGTTTTCGGCTTAGCAA	PDR1-V871F	DNF1-517533TAAGCCTTAGAAGCCTTAG>T
1242	CLM_alpha	ACCGTAATTCGCAAGGCCATTGGTAA_TAATTAACATCATTTAGTGTTACTGA	PDR1-V871F	URA3-A82S	HAA1-L468
2304	CLM_alpha	ATACTAAGTCATAAATGAATTCGCCA_TACAAAACACGTTTTCGGCTTAGCAA	PDR1-Y270S	MMS22-S1083C	GCY1-A38V	USE1-D39Y
4484	CLM_alpha	CGGATAAATGTTAATACTGTTATTCG_TTCCCAAGCGAATTATATTTTTGAGA	PDR1-Y864H
7944	CLM_alpha	TATGTAAACCACAAGGGCGTTGTGAG_TTCCCAAGCGAATTATATTTTTGAGA	PDR3-A681E
2462	CLM_alpha	ATCACAATACGAAACCAAGTTTGTCT_TTCCCAAGCGAATTATATTTTTGAGA	PDR3-C707F	NNF2-V100M	NUP116-A722V	STE50-I157
3436	CLM_alpha	CAGACAAAATCAAACTTACTTTATTT_TACAAAACACGTTTTCGGCTTAGCAA	PDR3-F710L	DNF1-517533TAAGCCTTAGAAGCCTTAG>T	YKL222C-S209I
3840	CLM_alpha	CCAGTAATCTAAAAGTTATTTTGTAG_TTCCCAAGCGAATTATATTTTTGAGA	PDR3-L249V
5183	CLM_alpha	CTTACAAAGTTCAACATGTTTAACCG_TACAAAACACGTTTTCGGCTTAGCAA	PDR3-L959Q
123	CLM_alpha	AAACTAATATCTAAAAGAATTAACAC_TACAAAACACGTTTTCGGCTTAGCAA	PDR3-R794S	YPL142C-282651CT>C	ZIP2-E428*	RTC5-G440
7019	CLM_alpha	GTGTAAATTTTGAAGTGTGTTGTCCC_CAACAAAAGCGTTTTTTACTTGTAAT	PDR3-Y963H
8002	FLC4_2N	TATTGAAGACAAAAGATGATTCATAA_CCATGAACATATTTGTCAATTACTTA	CYC8-L370P	TAF12-QQ264Q	SEC61-875358G>.ATTACTCGAGCCCGTAATACAACAG	SEC61-875363T>TGTTGTATCTCAAAATGAGATATGTCAGTATGACAATACGTCACCCTGAACGTTCATAAAACAC.	ALG1-V113	MNS1-G321
621	FLC4_2N	AAGTGAACTGATAATGGGATTTGGCG_CCATGAACATATTTGTCAATTACTTA	CYC8-Q610*	PSD2-S527*
6519	FLC4_2N	GGGATAATGGGTAACGGTCTTCTTGA_CCATGAACATATTTGTCAATTACTTA	HAP1-V638F
5770	FLC4_2N	GATCCAAAAATAAATTAGGTTGTCTT_AGGTAAAACCACTTCCCAATTTGGGC	PDR1-H689N
2717	FLC4_2N	ATGCTAATTGATAACTGTCTTTTTTA_CCATGAACATATTTGTCAATTACTTA	SSO2-627963T>A	ADR1-E548*	TGL2-A7	PAU6-781858G>T
7980	FLC4_2N	TATTCAAACTGGAATTTTTTTGCGGG_CCATGAACATATTTGTCAATTACTTA	SSO2-627963T>A	VPS35-S64T	ACC1-A1112
1121	FLC4_2N	ACCAAAAACTCTAACTATGTTCGAGG_CCATGAACATATTTGTCAATTACTTA	SSO2-627963T>A
4700	FLC4_2N	CGTTTAACTGTCAATCGTTTTCAGAA_AGGTAAAACCACTTCCCAATTTGGGC	SSO2-D233G	TUP1-I416_fs	ATG20-258605C>T	EST3-336521T>.ACCTAATATTATAGCCTTTATCAACAATGGAATCCCAACAATTATCTAATTACCCACACATTTCTCAT	EST3-336526T>TGTTGGAATAGAAATCAACTATCATCTACTAACTAGTATTTACATTACTAGTATAT.
9531	FLC4_2N	TTCAAAAAGGTTAAGACCATTGTGCT_CCATGAACATATTTGTCAATTACTTA	SUR1-F243L
6031	FLC4_2N	GCCCGAAAGGCCAATCCTTTTTTTTA_ATGGTAAAAGTGTTATCCATTGTGGA	TUP1-262515A>T	YOR192C-C-703664G>C
3612	FLC4_2N	CATATAATGGATAACCGATTTACAAG_AGGTAAAACCACTTCCCAATTTGGGC	TUP1-I416_fs	ATG20-258605C>T	EST3-336521T>.CCTAATATTATAGCCTTTATCAACAATGGAATCCCAACAATTATCTAATTACCCACACATTTCTCAT	EST3-336526T>TGTTGGAATAGAAATCAACTATCATCTACTAACTAGTATTTACATTACTAGTATATTATCATATACGGT.	YCR015C-142487C>A	YFR057W-268613C>CA
2020	FLC4_2N	AGTAAAAAGTGCAAATGGCTTGTTGT_AGGTAAAACCACTTCCCAATTTGGGC	TUP1-I416_fs	FMP40-D133E	ATG20-258605C>T	EST3-336521T>.AATATTATAGCCTTTATCAACAATGGAATCCCAACAATTATCTAATTACCCACACATTTCTCAT	EST3-336526T>TGTTGGAATAGAAATCAACTATCATCTACTAACTAGTATTTACATTACTAGTATATTATCATATAC.	PPT1-738960G>T
4021	FLC4_2N	CCGATAATAAATAAGCTAATTTGCAG_CCATGAACATATTTGTCAATTACTTA	TUP1-I704N	MIM1-274517A>.CCTAATATTATAGCCTTTATCAACAATGGAATCCCAACAATTATCTCAACATTCACCCATTTCTCAA	MIM1-274521G>GTGTTGGAATAAAAATCCACTATCGTCTATCAACTAATAGTTATATTATCAATATATTATCA.
176	FLC4_2N	AAAGTAAGGCGCAACGACCTTGCGGG_CCATGAACATATTTGTCAATTACTTA	VPS35-131054G>GT	JJJ2-QQQQQQH247H	RRM3-T73K	YDR307W-L213I	STB5-458640T>C	YGR266W-1022648C>A
2590	FLC4_2N	ATCTAAAGATGGAATTAGCTTGTACT_CCATGAACATATTTGTCAATTACTTA	YHK8-203404T>C	SPS22-N205K
282	FLC4_2N	AACAAAACTGATAAGCCAGTTCCGAT_CCATGAACATATTTGTCAATTACTTA	YHK8-N337T	MYO5-N1176	RPB5-549140T>A
1439	FLC4_alpha	ACTAGAACACGTAAAGCCTTTAGAGT_TTTGAAAAGAATTTGTCGTTTTTGTC	CSG2-E234D	PEX14-G275S
3105	FLC4_alpha	CAAAGAATAATAAACCTATTTCTAGG_TCCTAAACGGAATTTTTTCTTCACCT	CSG2-G258C	YHR095W-293710C>T
6110	FLC4_alpha	GCGCCAACCGCTAATTTCCTTTGTAG_TTTGAAAAGAATTTGTCGTTTTTGTC	CSG2-S26F	YOS9-K100*
3664	FLC4_alpha	CATGCAAATGTAAACAACGTTGAACT_TTTGAAAAGAATTTGTCGTTTTTGTC	CYC8-A384T	ARG5_6-P419H	YBL113C-L435V	YOL013W-A-A50S
1045	FLC4_alpha	ACAGGAATGACCAATTATCTTTAACT_TTTGAAAAGAATTTGTCGTTTTTGTC	CYC8-G265C	YFR057W-A146S	KIN1-A684	USO1-S1771	YIL014C-A-325548G>A
2123	FLC4_alpha	AGTTCAAGTGGGAAAGTCCTTCAGGA_TCCTAAACGGAATTTTTTCTTCACCT	CYC8-NA729_fs	RDN5-1-459803C>CTTTTTTTTTTTTTTTTTTTTTTTTTTTTTTTTTT	YFL054C-P539T
4456	FLC4_alpha	CGCTCAACTTATAACCCCTTTAAACT_TTTGAAAAGAATTTGTCGTTTTTGTC	CYC8-Y268D	RVS167-Q44E	YOR378W-Q270*	FLO5-S670	MCM7-T361
931	FLC4_alpha	ACAAAAAGATATAACAAGCTTGAAGA_CCCGAAAAAGTTTTTTATCTTCAATG	HAP1-646403A>C	MAL11-1073043T>C	YCL074W-4895A>C	YER188C-A-569203G>C	YIL163C-35909A>G	DIE2-R447S	NGR1-A437P	NUP188-S1268T	NUP85-G167E	SWD1-Y323N	TUB2-D437G	UFD2-N613T	VID22-T640K	YJU3-T72M	YLR177W-N205K	YPC1-K291R	MRL1-W111*	MSG5-P482	SMY2-E28	UTR2-S394	CHS6-239393A>G	IFM1-277830A>C	YLR326W-782057A>C	YLR326W-782053C>T	YOR1-1052378G>C
4429	FLC4_alpha	CGCGAAACAGAAAAGGTAGTTTGGTG_TTTGAAAAGAATTTGTCGTTTTTGTC	HAP1-V1471ETHKFNCSNKRSEIDQTSSN?	TMA64-V285L
9873	FLC4_alpha	TTGGCAACGGTAAAACGGCTTTAGGG_TCCTAAACGGAATTTTTTCTTCACCT	PDR1-E675K
527	FLC4_alpha	AAGCGAAATGATAATTACGTTCTACG_TTTGAAAAGAATTTGTCGTTTTTGTC	PDR1-S832N	CLG1-Y369D
444	FLC4_alpha	AACTGAAGATAGAACGGTTTTGATTG_TTTGAAAAGAATTTGTCGTTTTTGTC	PDR3-L249I	RGA2-S93
4867	FLC4_alpha	CTATCAAAATTTAATCTTATTCTACT_TTTGAAAAGAATTTGTCGTTTTTGTC	PDR3-R210M	KKQ8-N498	MAL31-E21
1266	FLC4_alpha	ACCTGAAGCCGTAACCCGGTTTCGTG_TTTGAAAAGAATTTGTCGTTTTTGTC	PDR5-E169K	PDR5-L790I	SRP72-154286C>A	PTP1-42699G>T	TUF1-683899G>A
7963	FLC4_alpha	TATTAAACAGTAAAGGCACTTCAAAG_TCATTAAATAAATTGGTCATTTCTAA	PDR5-P943T	RPS19B-61908A>G	YAR075W-229988G>GTGTGTGTGGGTGTGGGTGTGTGGGTGTGTGTGTG.	YAR075W-229988G>GTGTGTGTGGGTGTGGGTGTGTGGGTGTGTGTGTGTGGGTGTGGTGTGTGGGTGTGGTG.	YAR075W-229988G>GTGTGTGTGGGTGTGGGTGTGTGGGTGTGTGTGTGTGGGTGTGGTGTGTGGGTGTGGTGTGTGGGTGTGGTGTGT.	YAR075W-229988G>GTGTGTGTGGGTGTGGGTGTGTGGGTGTGTGTGTGTGGGTGTGGTGTGTGGGTGTGGTGTGTGGGTGTGGTGTGTGGGTG.	YAR075W-229988G>GTGTGTGTGGGTGTGGGTGTGTGGGTGTGTGTGTGTGGGTGTGGTGTGTGGGTGTGGTGTGTGGGTGTGTG.	DNA2-S1147I	MDH1-G262V	RDS2-E138*	RSM10-539207T>G
2748	FLC4_alpha	ATGGTAAGCCAAAATTTGGTTTTCGA_TCCTAAACGGAATTTTTTCTTCACCT	PDR5-T912S	TFG2-504627TA>T	MAE1-T50A	RPC11-T15
8813	FLC4_alpha	TGATAAATAGGGAATGTGATTACTGT_TCCTAAACGGAATTTTTTCTTCACCT	ROX1-K72T
3757	FLC4_alpha	CCAACAATGATCAAGTTTATTAAGAC_TCATTAAATAAATTGGTCATTTCTAA	ROX1-M1T	SPP382-976157A>AT	YAR075W-229988G>GTGTGTGTGGGTGTGGGTGTGTGGGTGTGTGTGTGTGGGTGTGGTGTGTGGGTGTGGTGTGTGGGTGTGGTGTGT.	RSM10-539207T>G
7921	FLC4_alpha	TATGAAATTGCTAATCTCTTTTATTG_TCCTAAACGGAATTTTTTCTTCACCT	ROX1-Q107*	YJR120W-F89L	MSN2-346697C>CT	OTU2-78514T>C
73	FLC4_alpha	AAAATAATAGTGAATTTTATTGTGGG_TTTGAAAAGAATTTGTCGTTTTTGTC	SKN7-D446E_fs	SKN7-D446E	TRS20-A6S	RRN6-L731
9371	FLC4_alpha	TTACAAAACTTGAAGATATTTGTCAG_TTTGAAAAGAATTTGTCGTTTTTGTC	SKN7-S411P	YFL052W-I360F	PPR1-G886
9361	FLC4_alpha	TTAATAATACGAAAGCTCTTTGCCGG_TCCTAAACGGAATTTTTTCTTCACCT	SKN7-S486*	STP3-A58G
6472	FLC4_alpha	GGCTAAAAAGCAAAAATGTTTAGCAT_TTTGAAAAGAATTTGTCGTTTTTGTC	SUR1-D141E	BDF2-SD450_fs	BDF2-D452Q_fs	SUR2-V58G	YDL073W-326531G>C
4984	FLC4_alpha	CTCGCAAGTGCAAATCTGTTTTAGTT_TCCTAAACGGAATTTTTTCTTCACCT	SUR1-E263*
8723	FLC4_alpha	TGAAGAATATATAATATGTTTAACGT_TTTGAAAAGAATTTGTCGTTTTTGTC	SUR1-H176Y	KIN1-A684	URA1-24718C>T
6582	FLC4_alpha	GGGTCAAACATGAACAGGTTTGACAC_TTTGAAAAGAATTTGTCGTTTTTGTC	SUR1-M1V	PRP11-L106	UTP22-661575G>GTTGGAATAGAAATCAACTATCATCTACTAACTAGTATTTACATTACTAGTATATTATCATATACG.
6742	FLC4_alpha	GTACGAATCAGGAATTTGATTGCAAA_TCCTAAACGGAATTTTTTCTTCACCT	SUR1-R218*	YPR071W-689417A>ATGTTGGAATAGAAATCAACTATCATCTACTAACTAGTATTTACATTACTAGTATATTATCATATACG.
9509	FLC4_alpha	TTATGAATTCGGAAAACTGTTCTTGA_TCCTAAACGGAATTTTTTCTTCACCT	SUR1-R360_fs	ROM2-E666Q
5501	FLC4_alpha	GACAAAAGCTCTAAAAGTATTTTTTT_TTTGAAAAGAATTTGTCGTTTTTGTC	SUR1-Y104*	MPC54-S373
3448	FLC4_alpha	CAGAGAATTGCCAAAGTAGTTGCGGT_TCCTAAACGGAATTTTTTCTTCACCT	SUR1-Y116_fs	SUR1-Y116N
6849	FLC4_alpha	GTCATAATTTCGAAGGAACTTGAAAG_TTTGAAAAGAATTTGTCGTTTTTGTC	SUR1-Y116*
3596	FLC4_alpha	CATAGAACGGTGAAAGAGTTTTGAGG_TCCTAAACGGAATTTTTTCTTCACCT	SUR1-Y235C	MNL2-P160
6052	FLC4_alpha	GCCGGAATCGGCAAGTCATTTCCCCG_TTTGAAAAGAATTTGTCGTTTTTGTC	SXM1-E701_fs	FKH2-I292V	LYP1-E598D	KIN1-A684	NFI1-630607A>G
6859	FLC4_alpha	GTCCCAACTCGGAAAACACTTCGCAG_TTTGAAAAGAATTTGTCGTTTTTGTC	SXM1-G259_fs	MRPL49-I155V	SIR4-D262N	YOR338W-L52S
1378	FLC4_alpha	ACGTAAAGCGTCAAATTAGTTTCTTG_TTTGAAAAGAATTTGTCGTTTTTGTC	SXM1-SS58_fs
8363	FLC4_alpha	TCCGTAATCATGAAATATATTAAGGT_TTTGAAAAGAATTTGTCGTTTTTGTC	TUP1-D699Y
1419	FLC4_alpha	ACTAAAATTTTTAATTCGGTTGTTTT_TCCTAAACGGAATTTTTTCTTCACCT	UPC2-L876P	RAD28-N226D
2110	FLC4_alpha	AGTTAAACGTAAAATATAATTTCGAA_TCCTAAACGGAATTTTTTCTTCACCT	UPC2-L876R	SWI1-T194S	CDC28-E171	YDR286C-1035726A>T
2022	FLC4_alpha	AGTAAAACATTTAAAACATTTGATTG_TCCTAAACGGAATTTTTTCTTCACCT	UPC2-V419F	AIM3-Q195K	MSH3-G843A
7454	GlyEtOH_2N	TACAAAAAATTAAAAAAAGTTCGCAC_GGGACAAGTGGGTTGGAGGTTGGGGG	HAP1-IYVTSI1483I	DAL82-G139D	TFB1-G351C
2467	GlyEtOH_2N	ATCAGAAAAGCAAACGTATTTAATTA_AACTAAATACCCTTTCAATTTGATGC	HAP1-K1474E	HAP1-V1485I	YDR193W-845155C>G	YGR153W-S29*	COG5-532648G>T	YDR445C-1352957A>.ATATACTAGTAATGTAAATACTAGTTAGTAGATGATAGTTGATTTCTATTCCAACAA
9127	GlyEtOH_2N	TGTAAAACTTTTAAATAAGTTGTGGC_AACTAAATACCCTTTCAATTTGATGC	HAP1-K1474E	HAP1-V1485I	YDR445C-1352957A>.TAGTAATGTAAATACTAGTTAGTAGATGATAGTTGATTTCTATTCCAACAA
6015	GlyEtOH_2N	GCCCAAACAGTAAAATCAGTTTGGTT_CATTTAATAGTGTTTGCGTTTAATCT	HEM2-A248E
5574	GlyEtOH_2N	GACGGAAGAGTGAAGTCAGTTCGACA_AACGTAAATCCATTTCCCATTGATCC	HEM2-L338*	YHM2-K209N	ERG24-W73*	NUP157-372015A>T	RML2-61004CT>C
8372	GlyEtOH_2N	TCCTAAACGGTAAACTAATTTGGCTA_TGCGAAAGGATGTTAAGAGTTTTCGG	HEM3-C111F	DCI1-674198C>A	SMC2-P1049L
4363	GlyEtOH_2N	CGATTAAAATAGAAGGCTTTTATCTC_TGCGAAAGGATGTTAAGAGTTTTCGG	HEM3-C111F
2470	GlyEtOH_2N	ATCAGAACAAATAAAGACTTTAGCGA_CATTTAATAGTGTTTGCGTTTAATCT	HEM3-G10E	PAN1-TTGMMPQT486T	KEL2-S312R	SEC10-Q303P
3640	GlyEtOH_2N	CATCGAACCGATAAGTAATTTAGCGA_GGGACAAGTGGGTTGGAGGTTGGGGG	HEM3-G130G_fs	IRA2-I1657N	GEA2-115824A>T	YJR008W-A92T	HIR3-P477
7410	GlyEtOH_2N	TAATCAATAAATAATAGGATTTCGGC_GGGACAAGTGGGTTGGAGGTTGGGGG	HEM3-G157E	CRP1-392117C>A	YDR370C-I290T	GIC2-1080464A>G
9745	GlyEtOH_2N	TTCTTAATCGATAATTACTTTGTATA_CATTTAATAGTGTTTGCGTTTAATCT	HEM3-G211C	IRA1-N66I	YJL045W-357931C>CTTAT	ARO10-K631Q
805	GlyEtOH_2N	AATGAAAGTTTCAAATCCATTTGCAT_CATTTAATAGTGTTTGCGTTTAATCT	HEM3-S20P	YER137W-A-Y85EKWVNVEIIVGIPLLIKAIIL?Y
6127	GlyEtOH_2N	GCGGAAAGGAGGAAATCTGTTGGGCT_CCTCAAAGCAAATTGTTTGTTTACGT	HEM3-Y261*	CYT2-L21V	POP1-E537*
9977	GlyEtOH_2N	TTTAAAATTTACAAAAACGTTGATCA_CCTCAAAGCAAATTGTTTGTTTACGT	NDI1-I298S	BDS1-R211	GIC1-S43
9249	GlyEtOH_2N	TGTTAAAGTGTAAATGCTCTTCATTG_CCTCAAAGCAAATTGTTTGTTTACGT	NDI1-I298S	YIL161W-39331A>C
4784	GlyEtOH_2N	CTACAAAAGGTCAATCTTATTCATTA_CATTTAATAGTGTTTGCGTTTAATCT	NDI1-R205G	NUP170-D1480H	TRM3-K841E	YLR257W-S178C	RPS11A-C58	YJR084W-T274
2175	GlyEtOH_2N	ATAACAACGAGAAATTGAGTTTCTGA_CCTCAAAGCAAATTGTTTGTTTACGT	WHI2-410637A>T	NCR1-A1141V	YCL076W-Y68*	HST3-I249
1285	GlyEtOH_2N	ACGAAAAATAACAATAATGTTTAGTG_TACATAAAAAGTTTAACGATTTCATC	WHI2-G141*	HOG1-373429C>A	MST28-189038G>C	RPL41B-221710T>C	YIL171W-20166G>A	CDC23-439193G>C
8346	GlyEtOH_2N	TCCGAAAAATAGAACCGCCTTCGGTC_TACATAAAAAGTTTAACGATTTCATC	WHI2-G141*	MFB1-Q162K	CDC23-439193G>C
5155	GlyEtOH_2N	CTGTTAACTACAAACTTATTTCGTCC_TACATAAAAAGTTTAACGATTTCATC	WHI2-G141*	PDR11-S1247P	SPT16-L320Q	CDC23-439193G>C
7632	GlyEtOH_2N	TACTTAAAAGAGAACACTTTTTGCTG_TACATAAAAAGTTTAACGATTTCATC	WHI2-G141*	SKI3-G186D	CDC23-439193G>C
3993	GlyEtOH_2N	CCCTTAAAATAGAATCAGTTTTTATG_TACATAAAAAGTTTAACGATTTCATC	WHI2-G141*	YCR064C-228047AT>A	TAF1-N11K	CDC23-439193G>C
8196	GlyEtOH_2N	TCATAAAGTGTCAAATCTATTGAGAT_TACATAAAAAGTTTAACGATTTCATC	WHI2-G141*	YML018C-D279E	CDC23-439193G>C
2008	GlyEtOH_2N	AGGTTAAACGCAAACAGTATTTCGCT_ATCACAATATGTTTACGTATTGTCCT	WHI2-S289P	AIM22-354139T>.CTGTCTACCTAATATTATAGCCTTTATCAACAATGGAATCCCAACAATTATCTCAACATTCACCCATTTCTCAT	AIM22-354143C>CTGTTGGAATAAAAATCAACTATCATCTACTAACTAGTATTTACGTTACTAGTATATTA.	TIM44-312466T>G	HAC1-I18T	RPL6B-Q28P	STP3-D73N
4499	GlyEtOH_2N	CGGCCAACTCTCAATGTGGTTCGATA_ATCACAATATGTTTACGTATTGTCCT	WHI2-S289P	FEN2-170066T>C	MIF2-R307M
2831	GlyEtOH_2N	ATTACAAAATGGAAGCATGTTCCGTC_ATCACAATATGTTTACGTATTGTCCT	WHI2-S289P	FEN2-170066T>C	PZF1-T360N
1229	GlyEtOH_2N	ACCGGAACGAATAAGCATTTTCTCAT_ATCACAATATGTTTACGTATTGTCCT	WHI2-S289P	FEN2-170066T>C	YSP3-D94E
8011	GlyEtOH_2N	TATTTAAACGACAAATTAGTTATTCT_ATCACAATATGTTTACGTATTGTCCT	WHI2-S289P	MDM36-N53S
9953	GlyEtOH_2N	TTTAAAAACTATAACTACATTTGTCA_CCTCAAAGCAAATTGTTTGTTTACGT	WHI2-VLREDLDYYC165_fs	BNI4-K343N	ARP8-I860	HST3-I249	CWP1-260535G>A
5760	GlyEtOH_alpha	GATCAAAATCAAAATAAGGTTTACAG_GGTAAAACCAGATTTGGCATTCACTA	GPB2-Q602*	DCV1-T148I
9872	GlyEtOH_alpha	TTGGCAACGGCGAATATGGTTCGTCT_GGTAAAACCAGATTTGGCATTCACTA	GPB2-Q602*	DYN1-T3862A
6383	GlyEtOH_alpha	GGATGAAACAACAACCTTTTTTAGCC_GGTAAAACCAGATTTGGCATTCACTA	GPB2-Q602*	KRE6-D47A
6954	GlyEtOH_alpha	GTGATAAGGGGTAAACTTTTTCGTGC_GGTAAAACCAGATTTGGCATTCACTA	GPB2-Q602*	MAS2-V387I	MPH3-740528C>A
8587	GlyEtOH_alpha	TCTCAAACAGGGAAGCCTCTTCGGGT_GGTAAAACCAGATTTGGCATTCACTA	GPB2-Q602*	NDD1-S527Y
7494	GlyEtOH_alpha	TACAGAATTAACAACTGATTTTTACA_GGTAAAACCAGATTTGGCATTCACTA	GPB2-Q602*	PSH1-227493T>G
2162	GlyEtOH_alpha	ATAAAAATCAGTAAATGCTTTACCCG_GGTAAAACCAGATTTGGCATTCACTA	GPB2-Q602*	TDA8-17542G>T
3778	GlyEtOH_alpha	CCACAAACCCTCAATGGGTTTGATAT_GGTAAAACCAGATTTGGCATTCACTA	GPB2-Q602*	TDP1-P264H
9165	GlyEtOH_alpha	TGTATAACCTGCAATTACTTTCATGA_GGTAAAACCAGATTTGGCATTCACTA	GPB2-Q602*	TRM1-691535A>C	CEG1-Y282C	RPS28B-673120G>C
3509	GlyEtOH_alpha	CAGGTAAGACCAAATGCGTTTTAATA_GGTAAAACCAGATTTGGCATTCACTA	GPB2-Q602*	YCR097W-A-295197T>TTGTTGGAATAAAAATCAACTATCATCTACTAACTAGTATTTACGTTACTAGTATATT.
279	GlyEtOH_alpha	AACAAAACAGATAAGCCATTTAATGG_GGTAAAACCAGATTTGGCATTCACTA	GPB2-Q602*
1671	GlyEtOH_alpha	AGAGAAAGCTCAAACGGTTTTTGTGT_GGTAAAACCAGATTTGGCATTCACTA	GPB2-Q602*
2853	GlyEtOH_alpha	ATTAGAAGAAATAAGCCTCTTAGCTG_GGTAAAACCAGATTTGGCATTCACTA	GPB2-Q602*
3369	GlyEtOH_alpha	CACGGAATTAGTAATAGCGTTATTTT_GGTAAAACCAGATTTGGCATTCACTA	GPB2-Q602*
4107	GlyEtOH_alpha	CCTAAAATACAGAAAACCTTTTTGCA_GGTAAAACCAGATTTGGCATTCACTA	GPB2-Q602*
5077	GlyEtOH_alpha	CTGCAAATCGTCAATGCAATTGATTG_GGTAAAACCAGATTTGGCATTCACTA	GPB2-Q602*
7069	GlyEtOH_alpha	GTTAGAATCGAAAAGCTTTTTTGAAA_GGTAAAACCAGATTTGGCATTCACTA	GPB2-Q602*
10050	GlyEtOH_alpha	TTTCCAAACTGTAATTATATTCCACA_AATAGAATCATCTTACTTCTTATTAC	GPB2-R509*	MLP2-P1581Q	YJL193W-Q122K	GAL10-278471T>G
7204	GlyEtOH_alpha	TAAAAAACAACGAACGGTGTTTTAGT_GATTAAAGCCTGTTGCATTTTAGTCG	IRA1-C2067*	NUT2-V130
340	GlyEtOH_alpha	AACCAAAACCGGAACTTGGTTGGTCG_GCCGAAACAGGGTTGCGGGTTGGAGG	IRA1-D1116_fs	YIL029C-300473T>TTGTTGGAATAGAAATCAACTATCATCTACTAACTAGTATTTACATT.
4019	GlyEtOH_alpha	CCGATAACGTTAAAGTTGTTTTGTTG_GCTTTAACAGATTTTCCTTTTTCTGC	IRA1-E2440*	PRP6-347526G>GTGTTGGAATAGAAATCAACTATCATCTACTAACTAGTATTTACATTACTAGTATATTATCATATACGG.
8770	GlyEtOH_alpha	TGACTAATGATAAAGTTAGTTCCGCC_GCCGAAACAGGGTTGCGGGTTGGAGG	IRA1-G1716_fs	SFI1-R405L	YLR001C-V288L	IME1-606021C>A
5545	GlyEtOH_alpha	GACCCAATTAGTAACGGCGTTCGGGG_AATAGAATCATCTTACTTCTTATTAC	IRA1-G780_fs	IRA1-G780*	YGR250C-990609G>T	YGR250C-990610G>C	YGR250C-990611A>C	CDC12-G16A	YSW1-S178*	YMR194C-A-P3	LSM2-170217A>T
7665	GlyEtOH_alpha	TAGAGAAACAGTAAGAAGCTTTTTAA_ATTTGAAGCTTGTTATGTATTTGCGT	IRA1-I1862S
2959	GlyEtOH_alpha	ATTGTAAATAGAAAGAACGTTTTGTC_AATAGAATCATCTTACTTCTTATTAC	IRA1-ILV1729I	YTA6-K517R	SDO1-185075T>C
3425	GlyEtOH_alpha	CACTTAATCAAGAATCTTTTTTTTCA_ATTTGAAGCTTGTTATGTATTTGCGT	IRA1-K2034_fs	TSC13-H99Q	AGP3-P444
2778	GlyEtOH_alpha	ATGTGAAATAGAAATGTGCTTCAATC_AATAGAATCATCTTACTTCTTATTAC	IRA1-L1429*
3860	GlyEtOH_alpha	CCATCAATTTGTAAGCATCTTAGATA_GCCGAAACAGGGTTGCGGGTTGGAGG	IRA1-L1549F_fs	YNL162W-A-331368C>G	DCP1-45692AATATATATATATATATATAT>A	UTP10-R1749
8475	GlyEtOH_alpha	TCGGAAAACCAGAAGTGCGTTAGGCG_AATAGAATCATCTTACTTCTTATTAC	IRA1-L587*	LSM2-170216TA>T	LSM2-170220C>G
8031	GlyEtOH_alpha	TATTTAATGTCTAAAGATATTGGCGA_AATAGAATCATCTTACTTCTTATTAC	IRA1-LLMRYLL2976_fs
3171	GlyEtOH_alpha	CAAGAAAACTCAAAACGTCTTAGCAG_GTACGAAGCGGGTTGAGGATTGGGGG	IRA1-P1827L	YNL285W-W38C	TRM3-D949G	TRS120-A397	RRP12-P873
4876	GlyEtOH_alpha	CTATCAATAAGTAAACATCTTGATCC_GCCGAAACAGGGTTGCGGGTTGGAGG	IRA1-S1612*	YNL162W-A-331368C>G	DCP1-45692AATATATATATATATATATAT>A
6044	GlyEtOH_alpha	GCCGCAAAATGGAAGAGCTTTCGCCG_AATAGAATCATCTTACTTCTTATTAC	IRA1-S2966*	BDS1-I103T
7044	GlyEtOH_alpha	GTTAAAAAGGCGAAAGAAATTACAAC_AATAGAATCATCTTACTTCTTATTAC	IRA1-W2779L_fs	GCN5-V92F
8132	GlyEtOH_alpha	TCACGAACTCGAAAGACAATTATAAA_AATAGAATCATCTTACTTCTTATTAC	IRA1-Y1239*	BMH2-Q251QQQ
3767	GlyEtOH_alpha	CCAATAAAACTGAACTCGTTTACCAG_AATAGAATCATCTTACTTCTTATTAC	IRA1-Y2354*	YDR391C-N227NVYDNILIILLVDRRWIFIP_fs	STE12-M352I	WSC2-V346L	SEC18-T185	CPR8-K38
7223	GlyEtOH_alpha	TAAACAAAGCCGAATTGTATTGGGCG_AATAGAATCATCTTACTTCTTATTAC	IRA2-E2558*	ECM14-368274C>A
2296	GlyEtOH_alpha	ATACTAACCCCAAAAAGGCTTATAGT_ATTTGAAGCTTGTTATGTATTTGCGT	IRA2-E3063*	NUP42-P344Q	BNR1-L1369R
3429	GlyEtOH_alpha	CAGAAAAATAGAAAATTATTTCGGTA_AATAGAATCATCTTACTTCTTATTAC	IRA2-F2628S	CYC3-W142C	CDC16-397254C>A
110	GlyEtOH_alpha	AAACGAACCAGTAAATTTCTTGATCC_AATAGAATCATCTTACTTCTTATTAC	IRA2-G2097*	PXR1-1050515T>C	THI7-P457	LSM2-170216TA>T	LSM2-170220C>G
6523	GlyEtOH_alpha	GGGCAAAAGCTTAATCAAATTGCACG_AATAGAATCATCTTACTTCTTATTAC	IRA2-I1463_fs	YIL055C-L439F	NIC96-M824I
8691	GlyEtOH_alpha	TCTTTAAACGCAAAGACGCTTGGTGT_AATAGAATCATCTTACTTCTTATTAC	IRA2-I339R	SCD5-S366Y
680	GlyEtOH_alpha	AATACAACAGCAAATCCTGTTTAAGT_AATAGAATCATCTTACTTCTTATTAC	IRA2-I339R	SNF11-NATA48	RCK2-636293C>A
2997	GlyEtOH_alpha	ATTTAAATGTATAATCGGTTTAAGAT_CGATCAACAGTGTTGCGCTTTATACG	IRA2-L598W	CRP1-390063A>G
5038	GlyEtOH_alpha	CTGAAAACGAGCAACGTAATTCTTAA_AATAGAATCATCTTACTTCTTATTAC	IRA2-R1852L
9735	GlyEtOH_alpha	TTCTTAAACAAAAATACTGTTTACTT_AATAGAATCATCTTACTTCTTATTAC	IRA2-R2195_fs	LSM2-170217A>T
6483	GlyEtOH_alpha	GGCTCAAGTGAAAATACTATTAGCGC_GCCGAAACAGGGTTGCGGGTTGGAGG	SSK2-G1275D	BUD14-166343T>G	YGR022C-528947AT>A	OCA4-Q108*	NPL3-L188
7773	GlyEtOH_alpha	TAGTGAATTGAAAACGCGTTTGGGGT_AGGAGAACGGGGTTGGGGGTTGGGGG	SSK2-L968_fs	BUR6-492241C>T
7364	GlyEtOH_alpha	TAAGGAATCTGCAAAAGATTTGGAGC_AGGAGAACGGGGTTGGGGGTTGGGGG	WHI2-410536G>A	PUG1-560487T>G	BUR6-492241C>T
5679	GlyEtOH_alpha	GAGGTAAATGGGAAGCAATTTTGGAT_AGGAGAACGGGGTTGGGGGTTGGGGG	WHI2-410536G>A	PUG1-560487T>G	YJR012C-459778C>CCTGTTGGGTGAATAATTTACCTAG	BUR6-492241C>T
7430	GlyEtOH_alpha	TAATGAATTGCGAAATAGGTTACTCG_AGGAGAACGGGGTTGGGGGTTGGGGG	YTA6-418169T>G	YAK1-G381D
