# Supplementary material for: Evolution of haploid and diploid populations reveals common, strong, and variable pleiotropic effects in non-home environments
Source: eLife. 2023 Oct 20;12:e92899. doi: 10.7554/eLife.92899 (PMC10629826; doi:10.7554/eLife.92899)
Supplement: Supplementary file 4. — Lineages from each evolution are categorized according to whether their fitness is positive or negative or neutral in each test environment. [file elife-92899-supp4.xlsx]

## Sheet: Sheet1
	n	pos_02M_NaCl	neu_02M_NaCl	neg_02M_NaCl	NA_02M_NaCl
CLM_2N	37	0	0.973	0.027	0
CLM_alpha	41	0	0	0	1
FLC4_2N	142	0	0.042	0.951	0.007
FLC4_alpha	45	0	0	0	1
GlyEtOH_2N	67	0.22	0.597	0.179	0
GlyEtOH_alpha	87	0	0	0	1
		pos_21C	neu_21C	neg_21C	NA_21C
CLM_2N	37	0	0.6486	0.351	0
CLM_alpha	41	0	0.8537	0.146	0
FLC4_2N	142	0	0.0563	0.944	0
FLC4_alpha	45	0.044	0.7778	0.178	0
GlyEtOH_2N	67	0.03	0.7761	0.194	0
GlyEtOH_alpha	87	0	0.5862	0.414	0
		pos_37C	neu_37C	neg_37C	NA_37C
CLM_2N	37	0	0.811	0.189	0
CLM_alpha	41	0	0.902	0.098	0
FLC4_2N	142	0	0.063	0.937	0
FLC4_alpha	45	0.044	0.489	0.467	0
GlyEtOH_2N	67	0.09	0.746	0.164	0
GlyEtOH_alpha	87	0.023	0.299	0.345	0.33
		pos_CLM	neu_CLM	neg_CLM	NA_CLM
CLM_2N	37	1	0	0	0
CLM_alpha	41	0	0	0	1
FLC4_2N	142	0.89	0.007	0.099	0
FLC4_alpha	45	0	0	0	1
GlyEtOH_2N	67	0.24	0.1194	0.567	0.075
GlyEtOH_alpha	87	0	0	0	1
		pos_FLC4	neu_FLC4	neg_FLC4	NA_FLC4
CLM_2N	37	1	0	0	0
CLM_alpha	41	1	0	0	0
FLC4_2N	142	1	0	0	0
FLC4_alpha	45	0.978	0.022	0	0
GlyEtOH_2N	67	0.299	0.209	0.493	0
GlyEtOH_alpha	87	0.23	0.667	0.011	0.092
		pos_GlyEtOH	neu_GlyEtOH	neg_GlyEtOH	NA_GlyEtOH
CLM_2N	37	0	0.297	0.703	0
CLM_alpha	41	0	0.829	0.171	0
FLC4_2N	142	0.021	0.063	0.915	0
FLC4_alpha	45	0.222	0.622	0.156	0
GlyEtOH_2N	67	0.791	0.209	0	0
GlyEtOH_alpha	87	0.736	0.264	0	0
		pos_pH3_8	neu_pH3_8	neg_pH3_8	NA_pH3_8
CLM_2N	37	0	0.324	0.676	0
CLM_alpha	41	0	0.61	0.39	0
FLC4_2N	142	0	0.042	0.958	0
FLC4_alpha	45	0.0667	0.8	0.133	0
GlyEtOH_2N	67	0.1194	0.642	0.239	0
GlyEtOH_alpha	87	0.1149	0.77	0.115	0
		pos_pH7_3	neu_pH7_3	neg_pH7_3	NA_pH7_3
CLM_2N	37	0	0.189	0.811	0
CLM_alpha	41	0	0.22	0.78	0
FLC4_2N	142	0	0.007	0.979	0.014
FLC4_alpha	45	0.0667	0.644	0.289	0
GlyEtOH_2N	67	0.0746	0.313	0.612	0
GlyEtOH_alpha	87	0.023	0.552	0.425	0
		pos_SC	neu_SC	neg_SC	NA_SC
CLM_2N	37	0	0.5135	0.486	0
CLM_alpha	41	0	0.878	0.122	0
FLC4_2N	142	0	0.1197	0.88	0
FLC4_alpha	45	0.044	0.8889	0.067	0
GlyEtOH_2N	67	0.209	0.5672	0.224	0
GlyEtOH_alpha	87	0.287	0.5747	0.138	0
		pos_YPD	neu_YPD	neg_YPD	NA_YPD
CLM_2N	37	0	0.892	0.1081	0
CLM_alpha	41	0	0.878	0.122	0
FLC4_2N	142	0	0.042	0.9577	0
FLC4_alpha	45	0.067	0.822	0.1111	0
GlyEtOH_2N	67	0	0.701	0.2985	0
GlyEtOH_alpha	87	0.598	0.299	0.1034	0
