# Supplementary material for: Evolution of haploid and diploid populations reveals common, strong, and variable pleiotropic effects in non-home environments
Source: eLife. 2023 Oct 20;12:e92899. doi: 10.7554/eLife.92899 (PMC10629826; doi:10.7554/eLife.92899)
Supplement: Supplementary file 5. [file elife-92899-supp5.xlsx]

## Sheet: Sheet1
Pool	BC1 Sequence	Evolution Condition
pool1	TTAATAATATCCAAAAGGGTTAAGAA	Haploid_YPD
pool1	ATCGTAATCTAGAAATTTTTTTAGCA	Haploid_YPD
pool1	CTATAAAATACGAAAATGGTTTTTCT	Haploid_YPD
pool1	CTAGAAACAGAGAAACGAGTTACAGT	Haploid_YPD
pool1	AATAAAATCCAAAAGACTGTTGATCA	Haploid_YPD
pool1	CCAAGAAAAAGTAAAATTATTTTTGT	Haploid_YPD
pool1	GAAAGAAAGAGCAATGTCATTTCGTT	Haploid_YPD
pool1	AAGCCAAAGACTAAAACTATTCTTTC	Haploid_YPD
pool2	AGTAAAAGCGCAAAGTTTATTTAAAT	Haploid_SC
pool2	CCTTGAAAGTACAATATGATTGGCGG	Haploid_SC
pool2	CACTCAATTGCAAAGAATCTTTTTAT	Haploid_SC
pool2	CGAACAAACTTAAACCCCTTTGACCC	Haploid_SC
pool2	GAACGAACAAAGAACAGCTTTAATAA	Haploid_SC
pool2	TGCGGAATTACGAACACCCTTGGGTC	Haploid_SC
pool2	CCATAAAACAGAAACCCTCTTGTGTA	Haploid_SC
pool3	CGACAAACGGATAACATAGTTTATTT	Haploid_48h
pool3	ACTATAAACATTAACTCGCTTGGGTT	Haploid_48h
pool3	ATTCAAATACGAAATGGGGTTGTAGA	Haploid_48h
pool3	ATTGAAATCCTTAATAGGATTACGCC	Haploid_48h
pool3	ACGGAAACCGTAAAGTTGCTTTTATA	Haploid_48h
pool3	GTGAAAACGCAAAACCTGATTAGATC	Haploid_48h
pool3	TAGAAAACACCAAACGGTTTTACCCA	Haploid_48h
pool4	ATATTAAAAATCAACGGTCTTTATCG	Haploid_37C
pool4	ATTATAATCGCGAAAAGATTTTGTAA	Haploid_37C
pool4	AATGAAACTTACAAAACAATTAAAGA	Haploid_37C
pool4	CCGGTAATGCGCAACCCCCTTCCCCC	Haploid_37C
pool4	AATAGAAAAGCTAATGACATTAAACC	Haploid_37C
pool4	CTATAAACAATAAATTCTATTGGAGC	Haploid_37C
pool4	TGTTAAATACATAATTATCTTTTTTC	Haploid_37C
pool4	CAGACAAGCTGAAAAGATATTTTGCG	Haploid_37C
pool4	CCTTTAATGAGAAATTTTATTCAGTT	Haploid_37C
pool4	GAGCCAACCAATAACTGTCTTCCCCC	Haploid_37C
pool4	AATTAAAAACTGAAGCGTATTGGTGA	Haploid_37C
pool4	AACGAAAGGAACAAACGAATTCGTGC	Haploid_37C
pool4	CATGGAAATTTTAACAATGTTACAGA	Haploid_37C
pool4	GAAATAATCGACAAACGTGTTCATGT	Haploid_37C
pool4	AACATAATGTTTAAGAAGTTTAATTC	Haploid_37C
pool4	GAACCAAAACTCAATCGTTTTAGGTA	Haploid_37C
pool5	AACATAATTATAAACATCATTAACCC	Haploid_LpH
pool5	TGCTTAATTATCAACACTATTGACAA	Haploid_LpH
pool5	AGAAGAAGCTTCAAAGTGATTTGTTC	Haploid_LpH
pool5	GTAGAAACTCAAAATTAGTTTTGCGA	Haploid_LpH
pool5	ATACGAAGTCCGAAGTCAATTCAATT	Haploid_LpH
pool5	ACACGAAAGATAAACAATCTTAAATA	Haploid_LpH
pool5	ATGTTAACTGAGAAACAACTTGTAGC	Haploid_LpH
pool5	CCGTCAAGGAACAAGGAGCTTCTCAT	Haploid_LpH
pool5	ATTGTAATTGAAAACCTCGTTTAAGT	Haploid_LpH
pool5	AACTAAAACCACAATAGGGTTCGATT	Haploid_LpH
pool5	AATATAAATTCTAATTGCATTTTTAA	Haploid_LpH
pool5	ATCCAAAGGACTAAAACAATTGCGTT	Haploid_LpH
pool5	GACAAAAATATTAAAAATATTGAAGG	Haploid_LpH
pool5	TACAAAAACTGTAAAGGAATTTTGCT	Haploid_LpH
pool6	TTTGTAAGGAAAAATACACTTTAGCA	Haploid_HpH
pool6	GTATTAAATACTAAAGATGTTCCAAT	Haploid_HpH
pool6	CTAATAATTTATAATCTGGTTCGCTA	Haploid_HpH
pool6	TTCGAAAGAGAAAAATCAGTTAATAG	Haploid_HpH
pool7	AAATCAAAAGTCAAGAGCATTATTGC	Haploid_21C
pool7	TTAATAAATAAAAATATGATTTCTGG	Haploid_21C
pool7	TACGGAATGGGTAAAATGATTTCAGG	Haploid_21C
pool7	CTAGTAAAAATAAAGACGCTTCGATG	Haploid_21C
pool7	TGACAAAAATTGAAGACTTTTCAGGT	Haploid_21C
pool8	CATTTAAATAGAAAAATTGTTATAAC	Haploid_02M_NaCl
pool8	TTAGAAATGACCAATTTATTTAATGA	Haploid_02M_NaCl
pool8	CACAAAAAAGTCAATACTGTTGCGAT	Haploid_02M_NaCl
pool8	TAAATAAAGTCAAACAAATTTTAGTG	Haploid_02M_NaCl
pool8	AGGGAAATAGGTAAGTGTATTTGATA	Haploid_02M_NaCl
pool8	AGGCCAATTATAAAATGCCTTTTGGA	Haploid_02M_NaCl
pool8	CATTTAACATTCAAAAACATTCTACT	Haploid_02M_NaCl
pool8	TAAAAAATAGACAATGGAGTTTTTAC	Haploid_02M_NaCl
pool8	AAAGAAACGTTCAAATGTATTGACGT	Haploid_02M_NaCl
pool8	ACGTAAAAGGGCAACCGTTTTTGGTT	Haploid_02M_NaCl
pool9	ATCTTAAATTTTAATTACATTTACAT	Haploid_08M_NaCl
pool9	AGCCAAAATAACAACCTTTTTATATG	Haploid_08M_NaCl
pool9	ACAAAAAATAAGAAAAGCATTAATTT	Haploid_08M_NaCl
pool9	TTTAGAAAAATCAACAATTTTAATTG	Haploid_08M_NaCl
pool9	ACAAAAAATGTCAAGTGCGTTCATTT	Haploid_08M_NaCl
pool9	TCCCTAAACCTGAAACAAGTTTTATC	Haploid_08M_NaCl
pool10	AAAGTAAGCGATAAATCTATTCGCAT	Haploid_GlyEtOH
pool10	CGTATAAAGCGCAACACTGTTGATCG	Haploid_GlyEtOH
pool10	CGACTAAAATGCAACAGGCTTTAATC	Haploid_GlyEtOH
pool10	ACATGAACGATCAAACGTGTTTCCTT	Haploid_GlyEtOH
pool10	ACGCAAATACATAACAAGCTTCAAAT	Haploid_GlyEtOH
pool10	GCAGAAAAAGGAAAATCTGTTAAAGC	Haploid_GlyEtOH
pool10	CCCCCAACCCCCAACCCCGTTCTCCT	Haploid_GlyEtOH
pool10	CCTCCAACCCGCAACCCTGTTTCGGC	Haploid_GlyEtOH
pool10	CCCCCAATCCTCAACCCGCTTCGTAC	Haploid_GlyEtOH
pool10	GTAATAAGAAGTAAGATGATTCTATT	Haploid_GlyEtOH
pool10	TAGTGAATGCCAAATCTGGTTTTACC	Haploid_GlyEtOH
pool11	TAAATAAGTATAAAAAATGTTTATAC	Haploid_FLC
pool11	CATTGAAGATAAAAAACTTTTTCGGG	Haploid_FLC
pool11	GACAAAAACGACAAATTCTTTTCAAA	Haploid_FLC
pool11	AGGTGAAGAAAAAATTCCGTTTAGGA	Haploid_FLC
pool12	CGGGAAACCTAGAAGCACTTTAGCTT	Haploid_CLM
pool12	ATTACAAGTAAAAAACGCTTTTGTTG	Haploid_CLM
pool12	TCAGTAACACTAAATGATGTTAATTA	Haploid_CLM
pool12	ATGAAAACATAGAAGACTTTTAGTAA	Haploid_CLM
pool12	GGATGAAACGATAAATCGCTTAAGCT	Haploid_CLM
pool12	AGAGGAAACTCCAATACCATTGCTAG	Haploid_CLM
pool12	CCTGCAAGCCCCAACTGGCTTCCCGT	Haploid_CLM
pool12	TCTCAAAAATATAATTCGCTTGGGAA	Haploid_CLM
pool12	TTGCTAAGCCGAAAACGTGTTTTGTA	Haploid_CLM
pool12	ATGAAAAGATTCAAAATAGTTTACAA	Haploid_CLM
pool13	AAAATAAGGACAAACCCTATTATCTA	Diploid_YPD
pool13	GGACAAACCTCAAATCGTTTTCTATA	Diploid_YPD
pool13	AATATAAAAGATAATCTGTTTAATCA	Diploid_YPD
pool13	TACTTAAGTTGAAAAGCAATTTCTAA	Diploid_YPD
pool13	TAATTAAAAATGAAACAGGTTGCCTT	Diploid_YPD
pool13	TAATAAAACTCCAAGAAAATTAAATG	Diploid_YPD
pool13	GCCGTAACAATCAACTCGTTTCACCC	Diploid_YPD
pool13	CATTCAAACACGAATCGCTTTCTTAG	Diploid_YPD
pool13	CAAAGAACTATCAAGCTCTTTTTAGT	Diploid_YPD
pool13	TTACTAATAATAAAATACATTTTAGT	Diploid_YPD
pool14	GTACGAACTAAAAATTATATTTGCCA	Diploid_SC
pool14	AGCCGAATGGATAACTAATTTAGGTG	Diploid_SC
pool14	GACGAAACGCTAAACCACATTCTGTC	Diploid_SC
pool14	GCCAAAATTGGCAACCCCATTTTACG	Diploid_SC
pool14	ACTACAAAGAACAAGAATCTTGCCTT	Diploid_SC
pool14	AGTCGAAATATCAATGGAGTTGTATT	Diploid_SC
pool14	GAGTGAAACAGAAACTTGATTGATTC	Diploid_SC
pool15	AAACTAAATAACAAGTCTTTTACATC	Diploid_48h
pool15	CAGATAAATAACAAATCAATTTACTC	Diploid_48h
pool15	GTTGGAAGTCTCAAGATTTTTTGTTC	Diploid_48h
pool15	CTACGAAGACGCAACCAAATTGGTTA	Diploid_48h
pool15	CCATGAAAGAATAATGGTTTTATAGT	Diploid_48h
pool15	GTACCAAGACAAAAAACTGTTATTTA	Diploid_48h
pool15	TCCCTAAGAGTAAACCAAGTTGTATC	Diploid_48h
pool15	GAAGCAACAGGCAAACCGATTATGTA	Diploid_48h
pool15	AGTATAAAACATAAGGTTGTTAGTGT	Diploid_48h
pool15	TTTAGAAAAATCAACAATTTTAATTG	Diploid_48h
pool15	TAATCAAAAGTCAAGAGACTTTAGAA	Diploid_48h
pool16	TCCTAAAACACAAACCCCATTCTGGG	Diploid_37C
pool16	ATCCAAACGCATAATTACTTTTAACC	Diploid_37C
pool16	TCACAAAATTACAACACTGTTTCGTT	Diploid_37C
pool16	ATATTAACGGAAAAATTGTTTCGTGT	Diploid_37C
pool16	TCGTAAACGATGAATGTGTTTCATGA	Diploid_37C
pool17	ATTTCAAAAGGGAAACCTATTGTATA	Diploid_LpH
pool17	ACAAGAAACGGCAATTAAATTTTGAG	Diploid_LpH
pool17	CTGCGAATAACTAAAATAATTCCAAG	Diploid_LpH
pool17	GCATAAAGAAAAAAGAAAGTTTGTTT	Diploid_LpH
pool17	ACTGCAATCACAAATATTATTGCGTC	Diploid_LpH
pool17	AACCAAACATATAATAAAATTCACTA	Diploid_LpH
pool17	CCCCAAATAGGCAAAGCTTTTCCCAA	Diploid_LpH
pool17	AAGAGAACAGATAACCTAATTTGAGT	Diploid_LpH
pool17	CCCTCAACCCTTAACGCAGTTCGCGC	Diploid_LpH
pool17	TCAACAAGCACTAAGTCGTTTAGTAT	Diploid_LpH
pool17	GATATAAACCGAAACCATCTTCGGCA	Diploid_LpH
pool17	ACTAAAAGTCCAAAATATTTTTGATA	Diploid_LpH
pool17	ACATTAACGACCAAAACTTTTTAATT	Diploid_LpH
pool18	ACCTAAAGAACAAACAAAGTTTATAT	Diploid_HpH
pool18	AACAAAACCTACAAGGTAATTAATAT	Diploid_HpH
pool18	TACTCAAAGAAAAACTCTATTACCTT	Diploid_HpH
pool18	CTTTAAACACGCAACCCCATTGCCTC	Diploid_HpH
pool18	TCTTTAATCTTTAACCTCTTTTAACA	Diploid_HpH
pool18	TAAGTAAGTGAAAAGCTGTTTAAATT	Diploid_HpH
pool18	CGCCTAAACACAAAAGAGGTTAAGTG	Diploid_HpH
pool18	CCCGCAAGTTACAAACTTGTTTCTCG	Diploid_HpH
pool18	GGAACAAGGCCTAACCCTGTTAGAAA	Diploid_HpH
pool18	GAAAGAATTATAAACGATTTTCATGG	Diploid_HpH
pool18	AGTTGAATTAAGAATACCTTTAGGAG	Diploid_HpH
pool18	CTGCAAAAATCGAACACCATTAAGCG	Diploid_HpH
pool18	GAGTGAAGTAGTAAACCTGTTTGATC	Diploid_HpH
pool18	TCCAAAAACGCGAACAGGATTTAAGA	Diploid_HpH
pool19	CGACAAATTAAAAAGCATGTTATGTG	Diploid_21C
pool19	TACCTAAATTTCAAACTTATTTGCCT	Diploid_21C
pool19	CATGGAACGAAAAACAAGTTTGATAA	Diploid_21C
pool19	TGCTTAATTATCAACACTATTGACAA	Diploid_21C
pool19	CAAGCAAAGAAGAAAGCCATTAACCG	Diploid_21C
pool19	TGGCAAACGTACAATTCTATTTGCTT	Diploid_21C
pool19	ACCGCAAAACTGAAGAATATTCCCCG	Diploid_21C
pool19	ACCCTAACACGAAACTGCGTTCGGAC	Diploid_21C
pool19	ATCACAAGATTTAAATTTATTACGAC	Diploid_21C
pool19	CTGGCAAACGTTAACCAAGTTAAGTG	Diploid_21C
pool19	AATTAAATATGTAATAGACTTCTCGT	Diploid_21C
pool19	AACAAAACATAAAACACAGTTACCAA	Diploid_21C
pool20	TCAAAAAAACACAATTTCGTTGGGTA	Diploid_02M_NaCl
pool20	CAATAAAACTGAAATGAAGTTGCATA	Diploid_02M_NaCl
pool20	TACATAACAAAAAAATCGATTGACAC	Diploid_02M_NaCl
pool20	GCCGAAATTACAAAATGTTTTGAATT	Diploid_02M_NaCl
pool20	CGTGCAAGTGATAATAATATTTTACG	Diploid_02M_NaCl
pool20	TAACCAAATCCCAAATCTATTTGCGT	Diploid_02M_NaCl
pool20	ACTCAAATAAACAAAATGTTTGCGCC	Diploid_02M_NaCl
pool20	GCTCTAAACCATAACCTAATTAGCGT	Diploid_02M_NaCl
pool20	TGAACAAGACTTAAGGCTATTAGAAA	Diploid_02M_NaCl
pool21	TCGACAATGCATAACGACCTTGTAAA	Diploid_08M_NaCl
pool21	TCTAAAACAATGAAGGCCTTTAGAAA	Diploid_08M_NaCl
pool21	TCGTAAACTAGCAATAGTGTTAGTAT	Diploid_08M_NaCl
pool21	TCAGCAAGACTTAAGATCCTTCCGAC	Diploid_08M_NaCl
pool21	TGCATAAGGCCTAAATGCATTGTGTA	Diploid_08M_NaCl
pool21	GCAGCAATACTCAAACTGTTTATGAC	Diploid_08M_NaCl
pool21	AGTTAAAATCCCAAATTTGTTTGTTA	Diploid_08M_NaCl
pool21	GATAAAATGAATAAAACAATTGATTG	Diploid_08M_NaCl
pool21	CGAAAAAACAGGAACACTTTTTTCAT	Diploid_08M_NaCl
pool21	GATTAAAATTAAAACACAATTAATAT	Diploid_08M_NaCl
pool21	TCACGAAATTTAAAGAGTTTTATTTG	Diploid_08M_NaCl
pool21	TTAACAAAAGTAAAATGCTTTTCTTA	Diploid_08M_NaCl
pool21	GTTATAATCTGGAACACGCTTAAAAA	Diploid_08M_NaCl
pool21	AAAAGAACAAAAAAGATTATTAAAGT	Diploid_08M_NaCl
pool22	AGATTAAACGCAAACACTATTAAATG	Diploid_GlyEtOH
pool22	AATTAAACAATAAACTTGATTATTCG	Diploid_GlyEtOH
pool22	GGATCAATGGGAAATGGATTTACGTT	Diploid_GlyEtOH
pool22	CCCCCAACCTCCAACCCACTTGTCCC	Diploid_GlyEtOH
pool22	CCGAAAACTCTTAACATCCTTTCGCA	Diploid_GlyEtOH
pool22	ACGTAAACAAACAATTTGCTTTGAGG	Diploid_GlyEtOH
pool22	AGGACAATACGTAAACATATTGTGAT	Diploid_GlyEtOH
pool22	GATGAAATCGTTAAACTTTTTATGTA	Diploid_GlyEtOH
pool22	GCATCAAATTGAAAGGGTATTTAGTT	Diploid_GlyEtOH
pool23	TAAGTAATTGACAAATATGTTCATGG	Diploid_FLC
pool23	GCCCAAATTGGGAAGTGGTTTTACCT	Diploid_FLC
pool23	TCCACAATGGATAACACTTTTACCAT	Diploid_FLC
pool23	CCAGCAACCCGGAACCGCGTTGCCCC	Diploid_FLC
pool23	GCGATAAGATGGAACTTGCTTTAAAT	Diploid_FLC
pool23	AAAACAAGAAAAAAAATGATTAATAG	Diploid_FLC
pool23	AAGCCAAACAAAAAAGTTGTTGACAT	Diploid_FLC
pool23	TACATAAACTAAAATACTGTTTGAAT	Diploid_FLC
pool23	CAAGTAAAATTCAAGCCATTTCAGCA	Diploid_FLC
pool23	ACGCGAACATGTAACTATCTTGTGTC	Diploid_FLC
pool24	CAACAAATTACTAATGAAGTTAATAA	Diploid_CLM
pool24	CAACTAAAAAGAAAACCGTTTTAAAC	Diploid_CLM
pool24	CTCCCAAGGCCAAATAAGGTTCAAAA	Diploid_CLM
pool24	CCCCCAACCGTAAAGAATCTTGAAAT	Diploid_CLM
