# Supplementary material for: Evolution of haploid and diploid populations reveals common, strong, and variable pleiotropic effects in non-home environments
Source: eLife. 2023 Oct 20;12:e92899. doi: 10.7554/eLife.92899 (PMC10629826; doi:10.7554/eLife.92899)
Supplement: Supplementary file 6. [file elife-92899-supp6.xlsx]

## Sheet: Sheet1
BFA	Environment	Replicate	Timepoint	Notes
dBFA	SC	R1	16	AT3
dBFA	SC	R2	40	AT3
dBFA	pH3_8	R1	32	AT3
dBFA	pH3_8	R2	8;24	AT1
dBFA	pH3_8	R3	32	AT2
dBFA	CLM	R1	24;32;40	Extinction
dBFA	CLM	R2	24;32;40	Extinction
dBFA	CLM	R3	24;32;40	Extinction
dBFA	FLC4	R1	24;32;40	Extinction
dBFA	FLC4	R2	24;32;40	Extinction
dBFA	FLC4	R3	24;32;40	Extinction
hBFA	37C	R2	24	AT1
hBFA	GlyEtOH	R1	24	AT1
hBFA	pH3_8	R2	16	AT2
hBFA	FLC4	R2	16	AT1
cBFA	37C	R3	16	AT1
cBFA	CLM	R1	24;32;40	Extinction
cBFA	CLM	R2	24;32;40	Extinction
cBFA	CLM	R3	24;32;40	Extinction
cBFA	FLC4	R1	32;40	Extinction
cBFA	FLC4	R2	32;40	Extinction
cBFA	FLC4	R3	8;32;40	Contamination (8); Extinction
cBFA	GlyEtOH	R1	40	Contamination
cBFA	SC	R3	8;24	AT2
cBFA	pH3_8	R3	EXCLUDE ALL	AT1
cBFA	pH7_3	R3	8;24	AT1
cBFA	YPD	R3	8;24;32	AT1
