# Supplementary figures and images for: Evolution of haploid and diploid populations reveals common, strong, and variable pleiotropic effects in non-home environments
Source: eLife journal article supplement (doi:10.7554/elife.92899), 2023-10-20

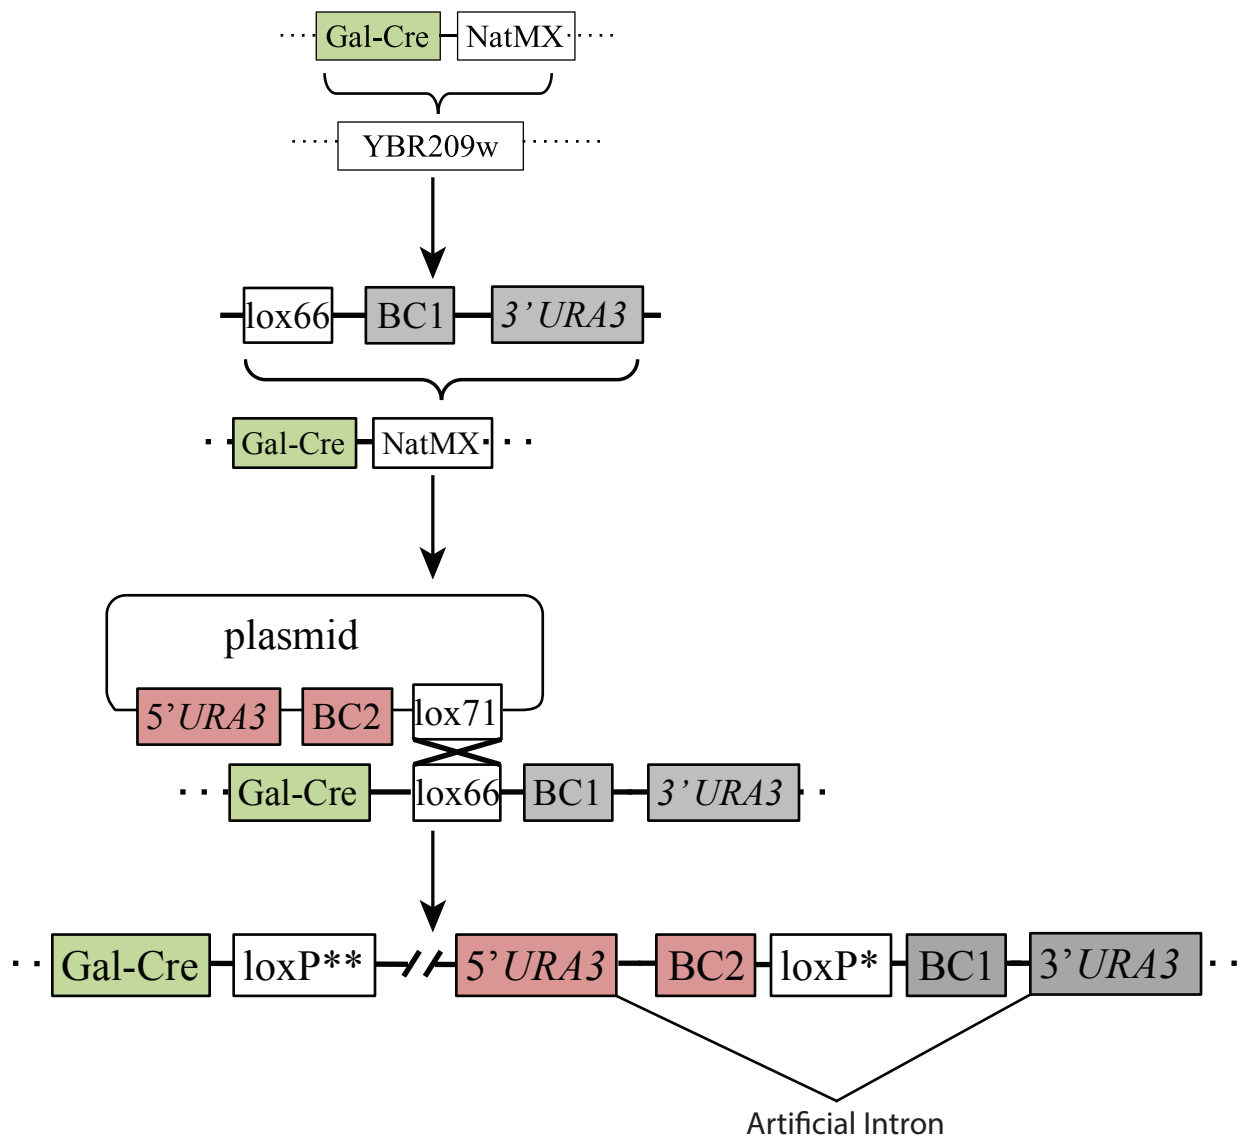

Supplement: supp [file elife-92899-supp-v1.zip]

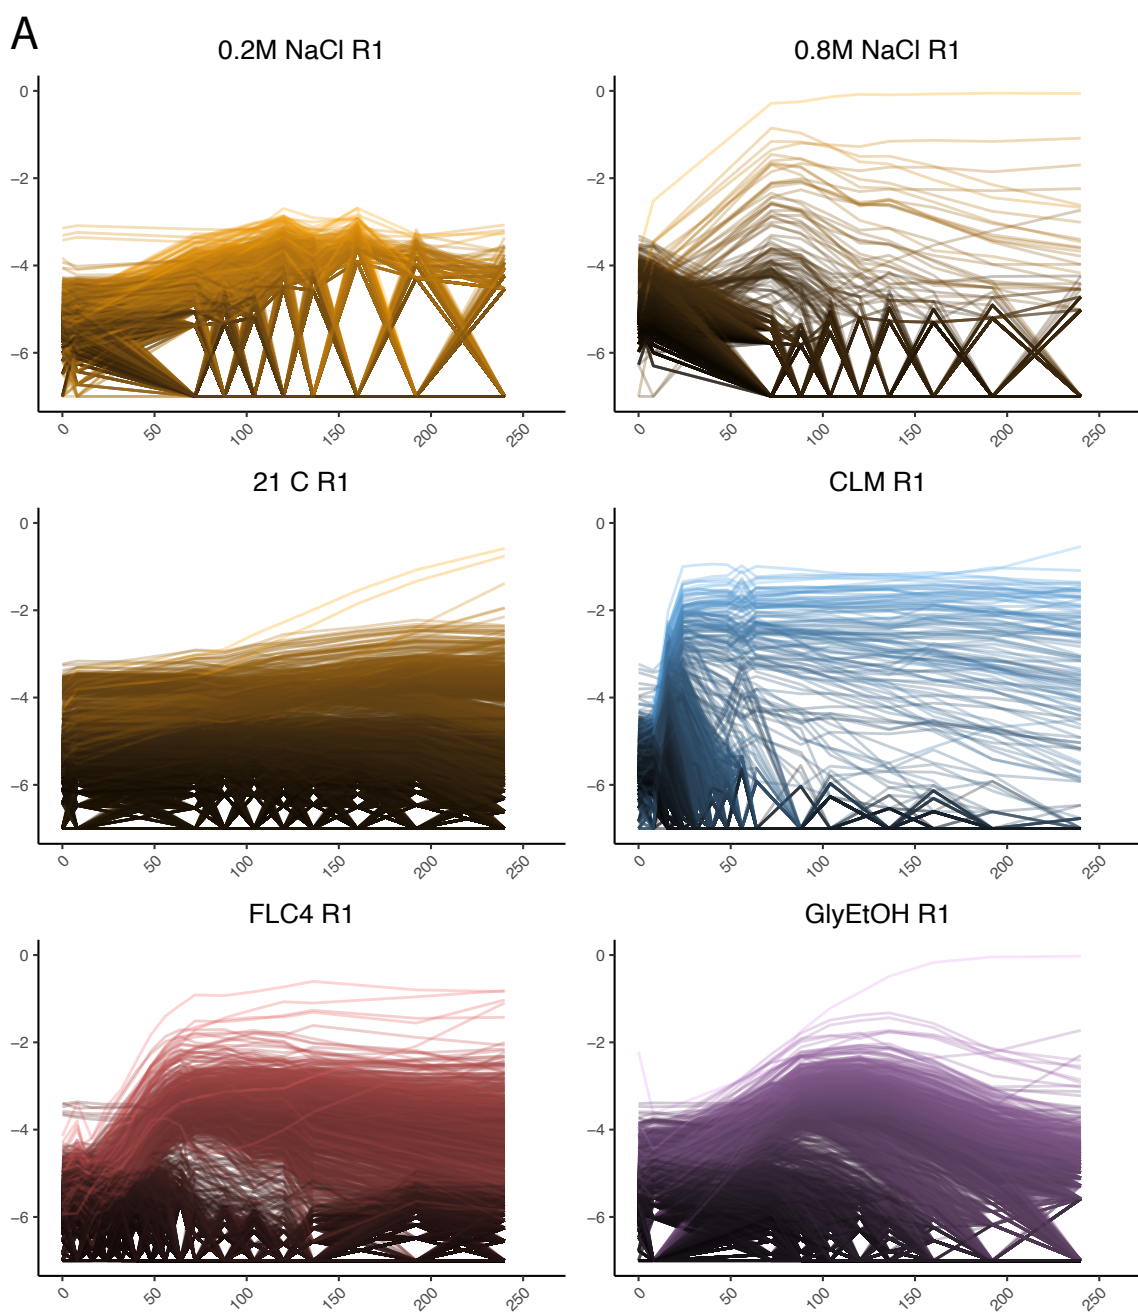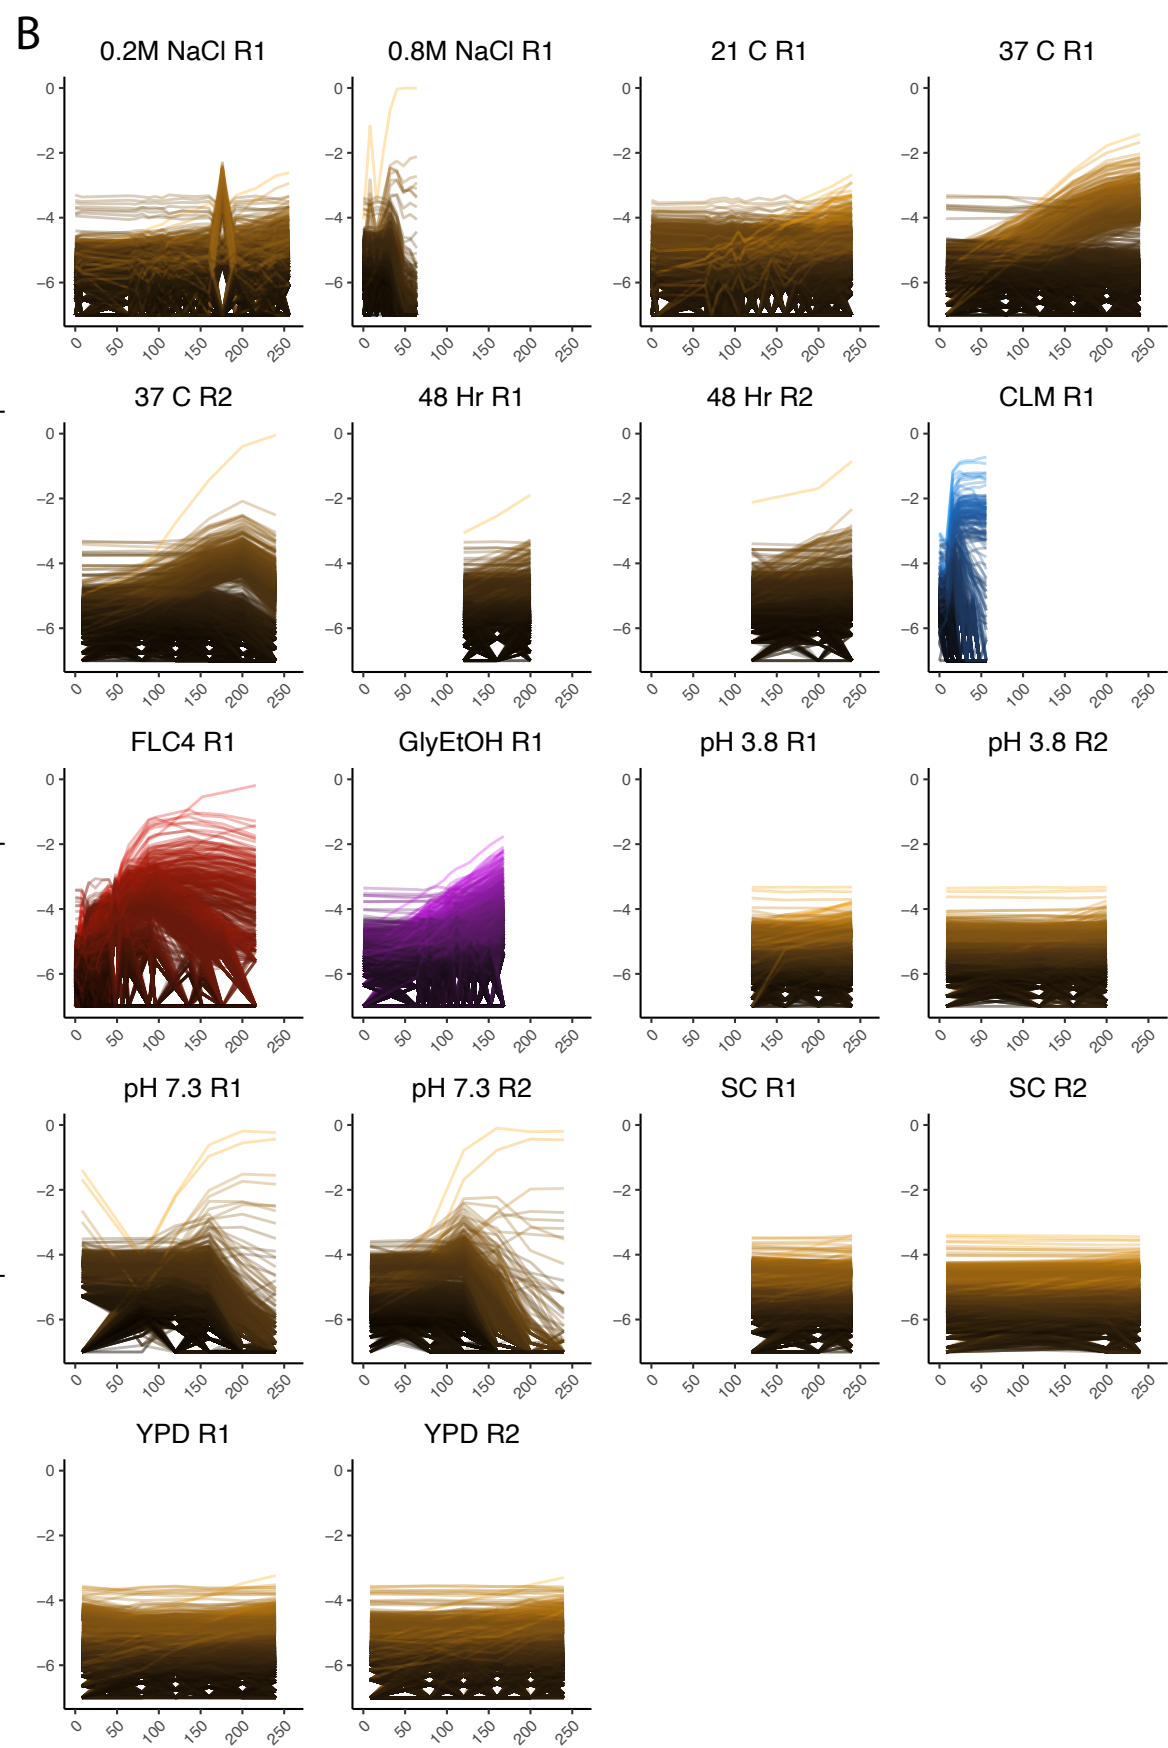

Supplement: supp [file elife-92899-supp-v1.zip]
